# Supplementary material for: Degradable emulsion-templated scaffolds for tissue engineering from thiol–ene photopolymerisation
Source: Royal Society of Chemistry journal article supplement (doi:10.1039/c2sm26250a), 2012-01-01
Supplement: c2sm26250a.pdf [file c2sm26250a.pdf]

# Degradable Emulsion-templated Scaffolds for Tissue Engineering from Thiol-Ene Photopolymerisation

Sally Caldwell<sup>ab</sup>, David W. Johnson<sup>ab</sup>, Matthew P. Didsbury<sup>ab</sup>, Jun Jie Wu<sup>bc</sup>, Neil R. Cameron<sup>\*ab</sup>

<sup>a</sup> Department of Chemistry, Durham University, South Road, Durham, DH1 3LE, U.K. Email: n.r.cameron@durham.ac.uk.

<sup>b</sup> Biophysical Science Institute, Durham University, South Road, Durham, DH1 3LE, U.K.

<sup>c</sup> School of Engineering and Computer Sciences, Durham University, South Road, Durham, DH1 3LE, UK

## Supplementary Information File

### Contents

- HIPE compositions
- Mechanical properties of thiol-ene polyHIPEs
- Influence of fluorescein *o*-acrylate on polyHIPE morphology

## HIPE Compositions

The compositions of the HIPEs prepared are shown in Table S1.

**Table S1. Compositions of HIPEs used to Prepare Thiol-Ene PolyHIPEs**

| PolyHIPE | Porosity (%) | Temperature (°C) | Water (ml) | CHCl <sub>3</sub> (ml) | Trithiol (ml) | Acrylate <sup>a</sup> (ml) |
|----------|--------------|------------------|------------|------------------------|---------------|----------------------------|
| 1        | 80           | 23               | 56         | 7                      | 3.85          | 3.15                       |
| 2        | 80           | 80               | 56         | 7                      | 3.85          | 3.15                       |
| 3        | 90           | 23               | 110        | 5.25                   | 3.85          | 3.15                       |
| 4        | 90           | 80               | 110        | 5.25                   | 3.85          | 3.15                       |
| 5        | 80           | 23               | 70         | 7.0                    | 4.0           | 3.0                        |
| 6        | 80           | 80               | 70         | 7.0                    | 4.0           | 3.0                        |
| 7        | 90           | 23               | 126        | 7.0                    | 4.0           | 3.0                        |
| 8        | 90           | 80               | 126        | 7.0                    | 4.0           | 3.0                        |

<sup>a</sup> PolyHIPEs 1-4 are made using TMTPA, 5-8 from DPEHA.

## Mechanical Properties of Thiol-Ene PolyHIPEs

The mechanical behaviour of the trithiol-TMTPA and trithiol-DPEHA materials are demonstrated qualitatively in the accompanying videos.

Trithiol-TMTPA: filename 'TMTPA movie.AVI'

Trithiol-DPEHA: filename 'DPEHA movie.AVI'

## Influence of Fluorescein O-acrylate on PolyHIPE Morphology

SEM images of polyHIPE materials corresponding to PolyHIPE 8 in Table 1, with and without fluorescein *o*-acrylate, are shown in Figure S1. The fluorescent acrylate was added at 2 mol% of the total acrylate group content.

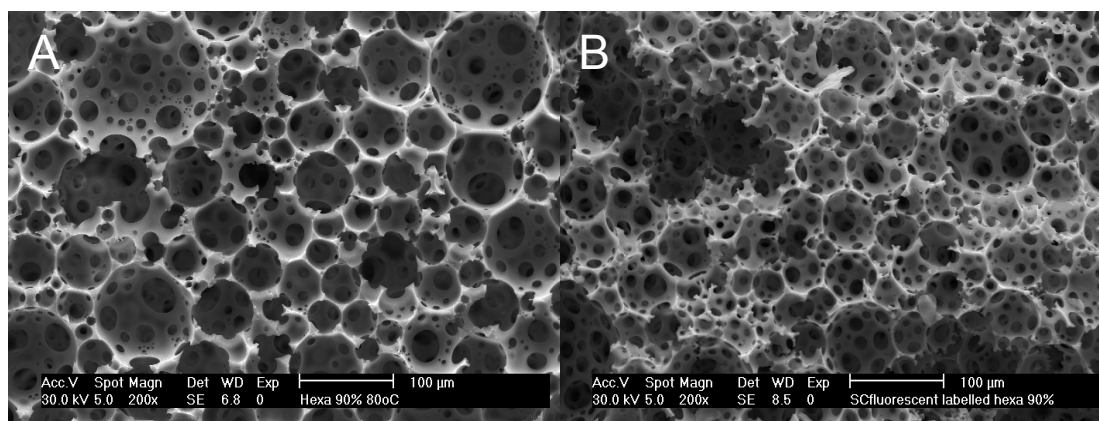

**Figure S1.** SEM images of polyHIPE 8 (see Table 1) without (A) and with (B) added fluorescein *o*-acrylate (2 mol%).
